# Supplementary material for: Molecular Adaptation during a Rapid Adaptive Radiation
Source: PubMed Central journal article supplement — Mol Biol Evol. 2013 Jan 25;30(5):1051–9. doi: 10.1093/molbev/mst013 (PMC3670742; doi:10.1093/molbev/mst013), 2013-01-25
Supplement: supp_mst013_Figures_S1-S3.pdf [file supp_mst013_Figures_S1-S3.pdf]

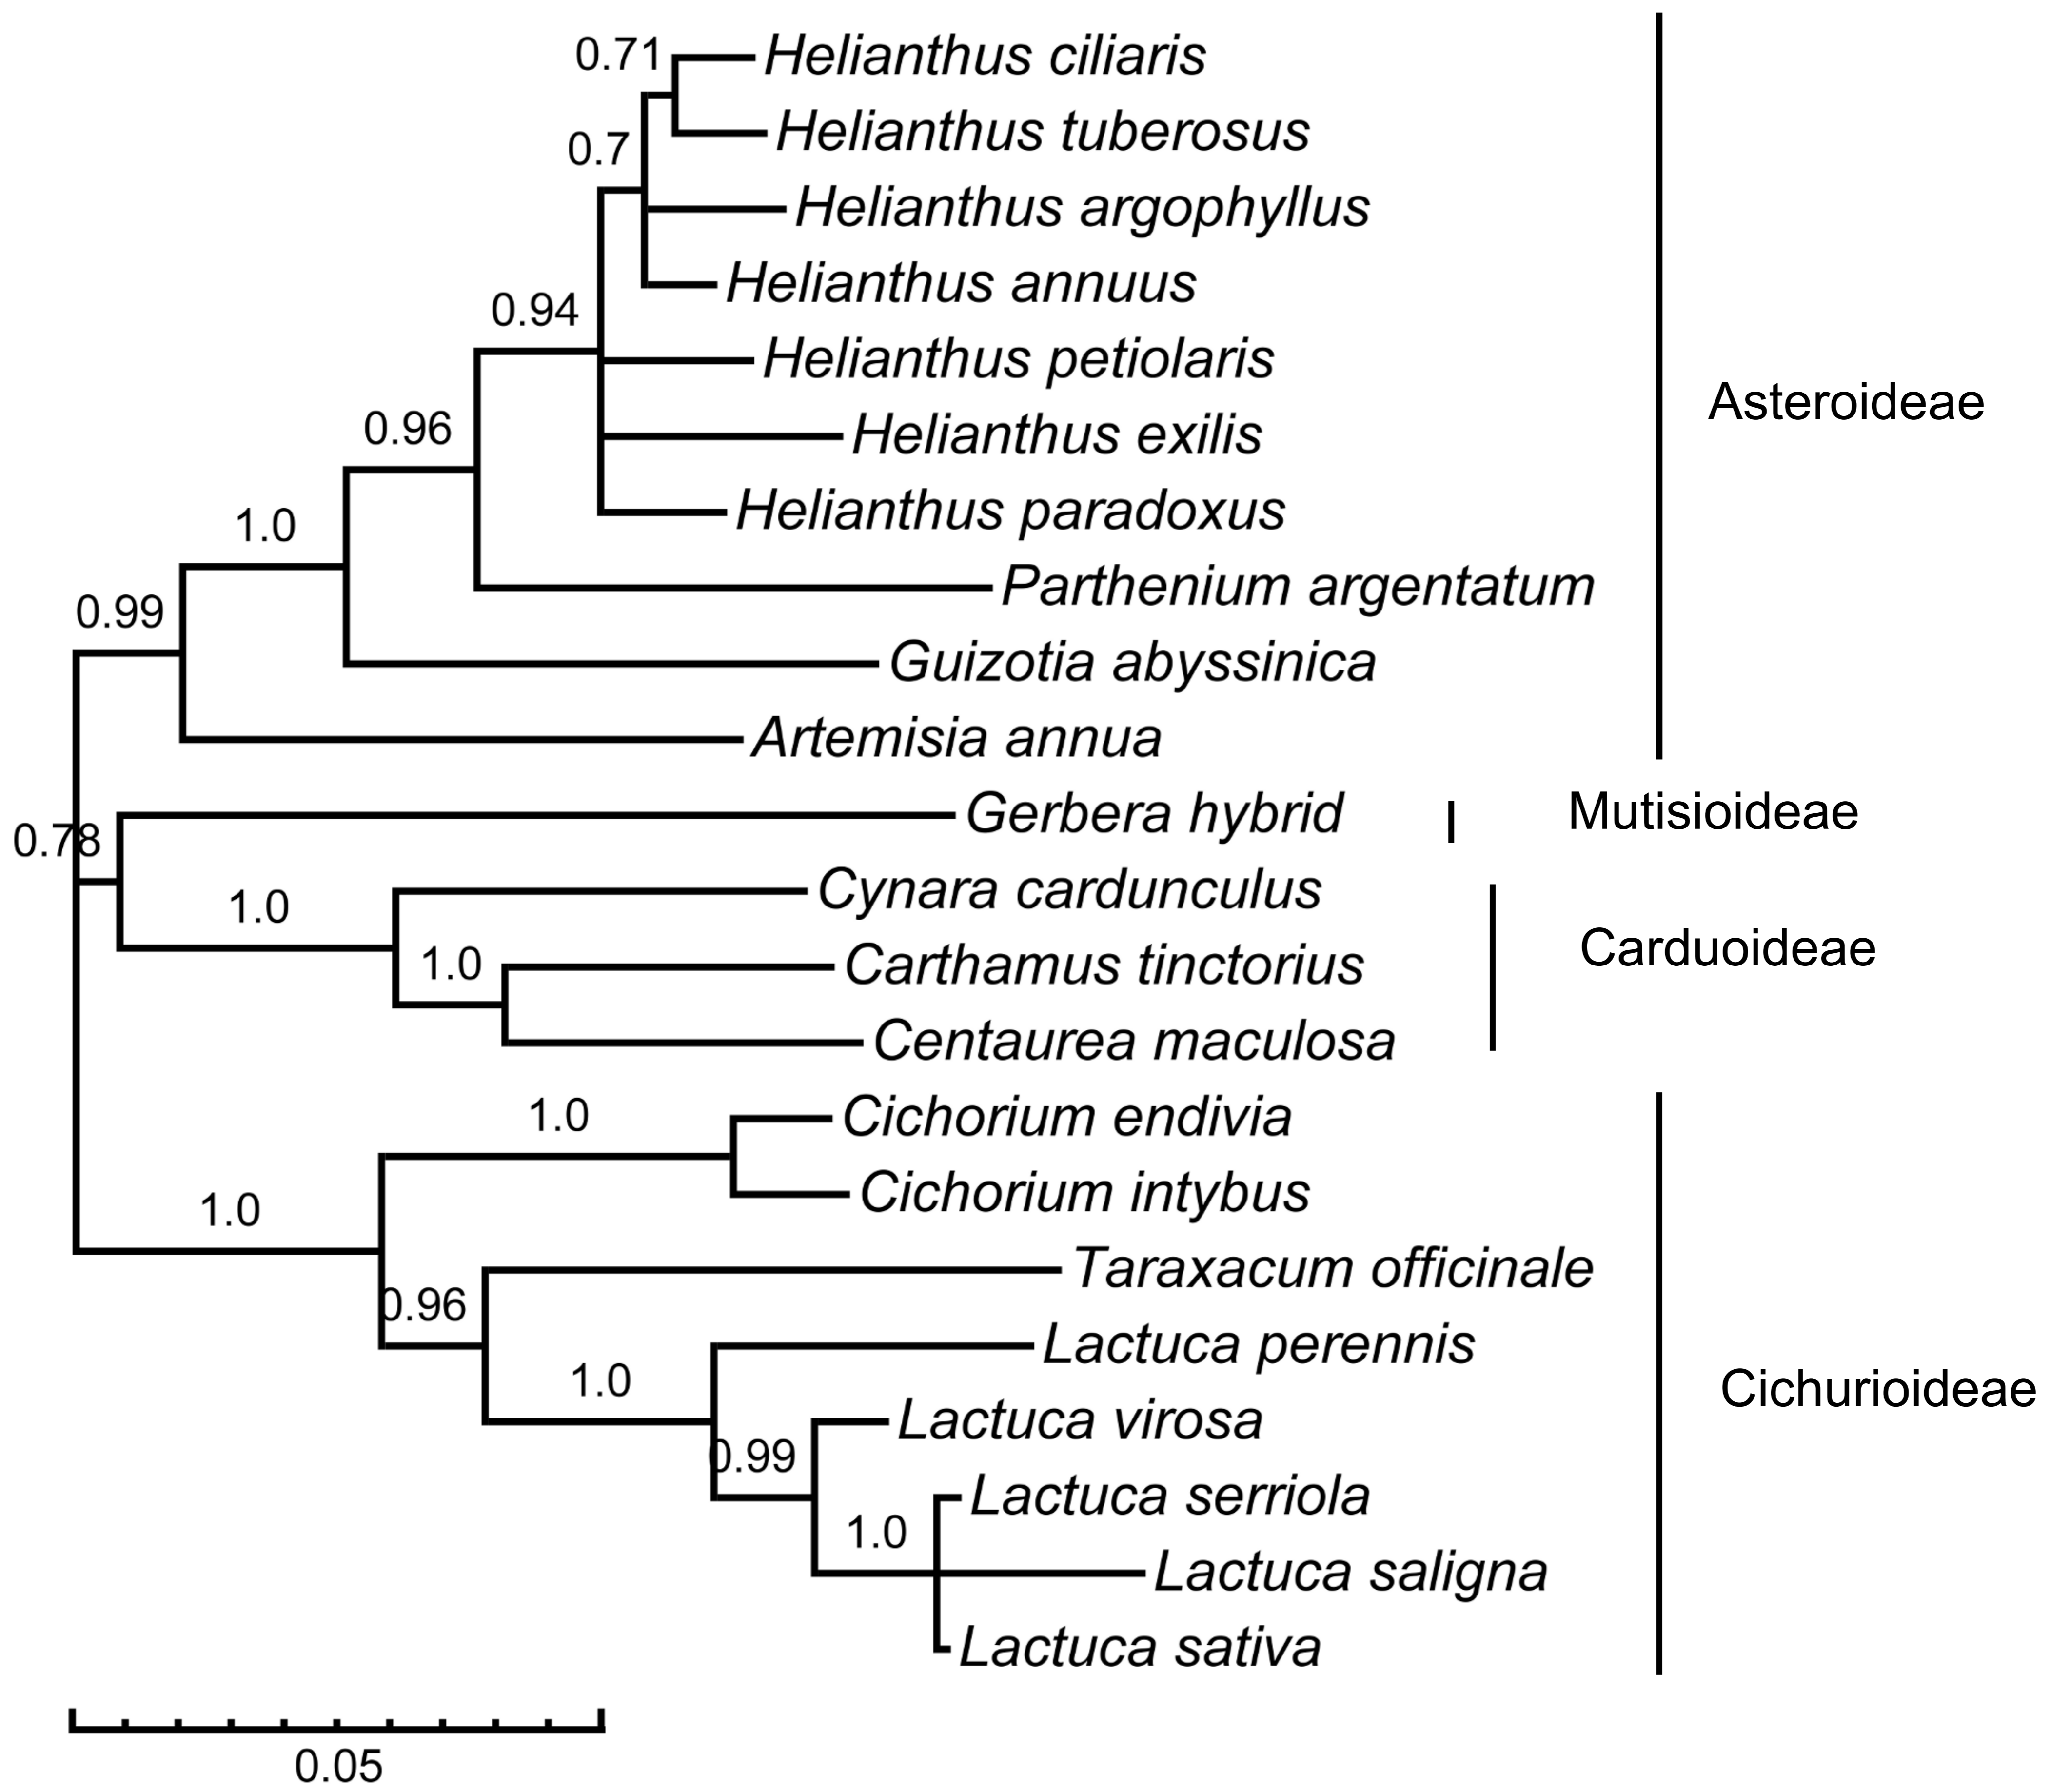

Figure S1. The phylogeny of mainland Asteraceae species used for comparisons with island Schiedea.

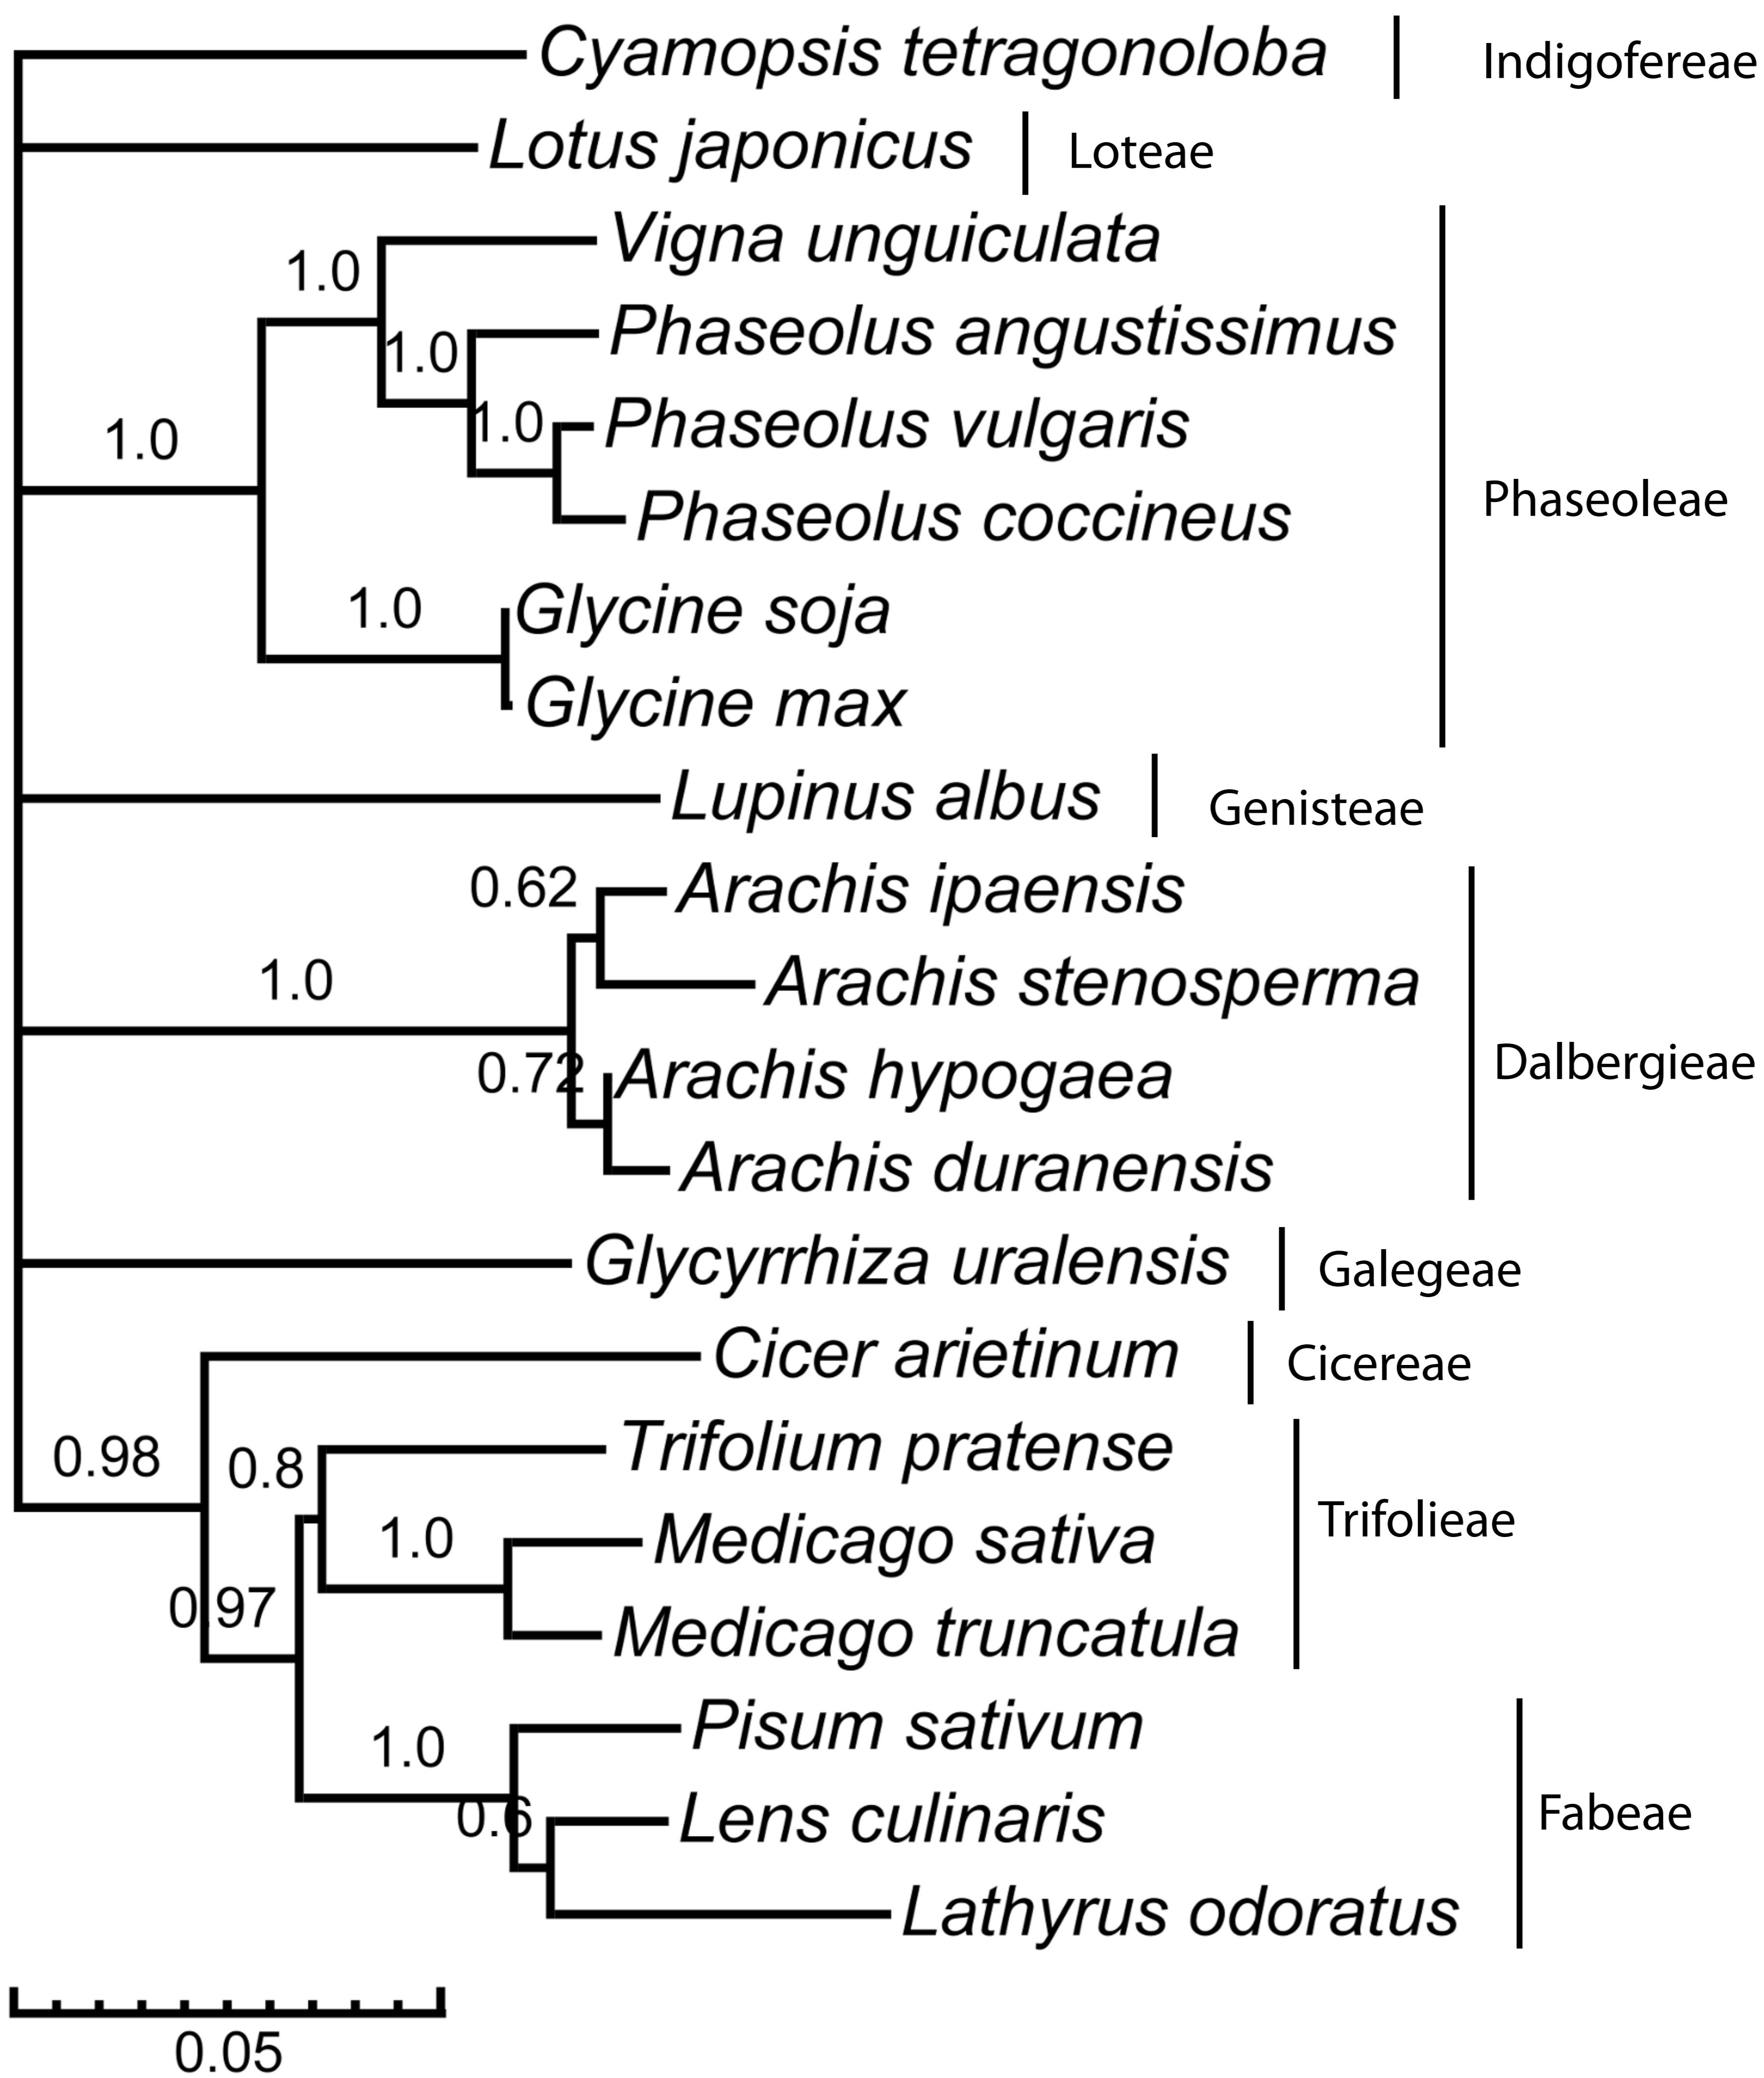

Figure S2. The phylogeny of mainland Fabaceae species used for comparisons with island *Schiedea*.

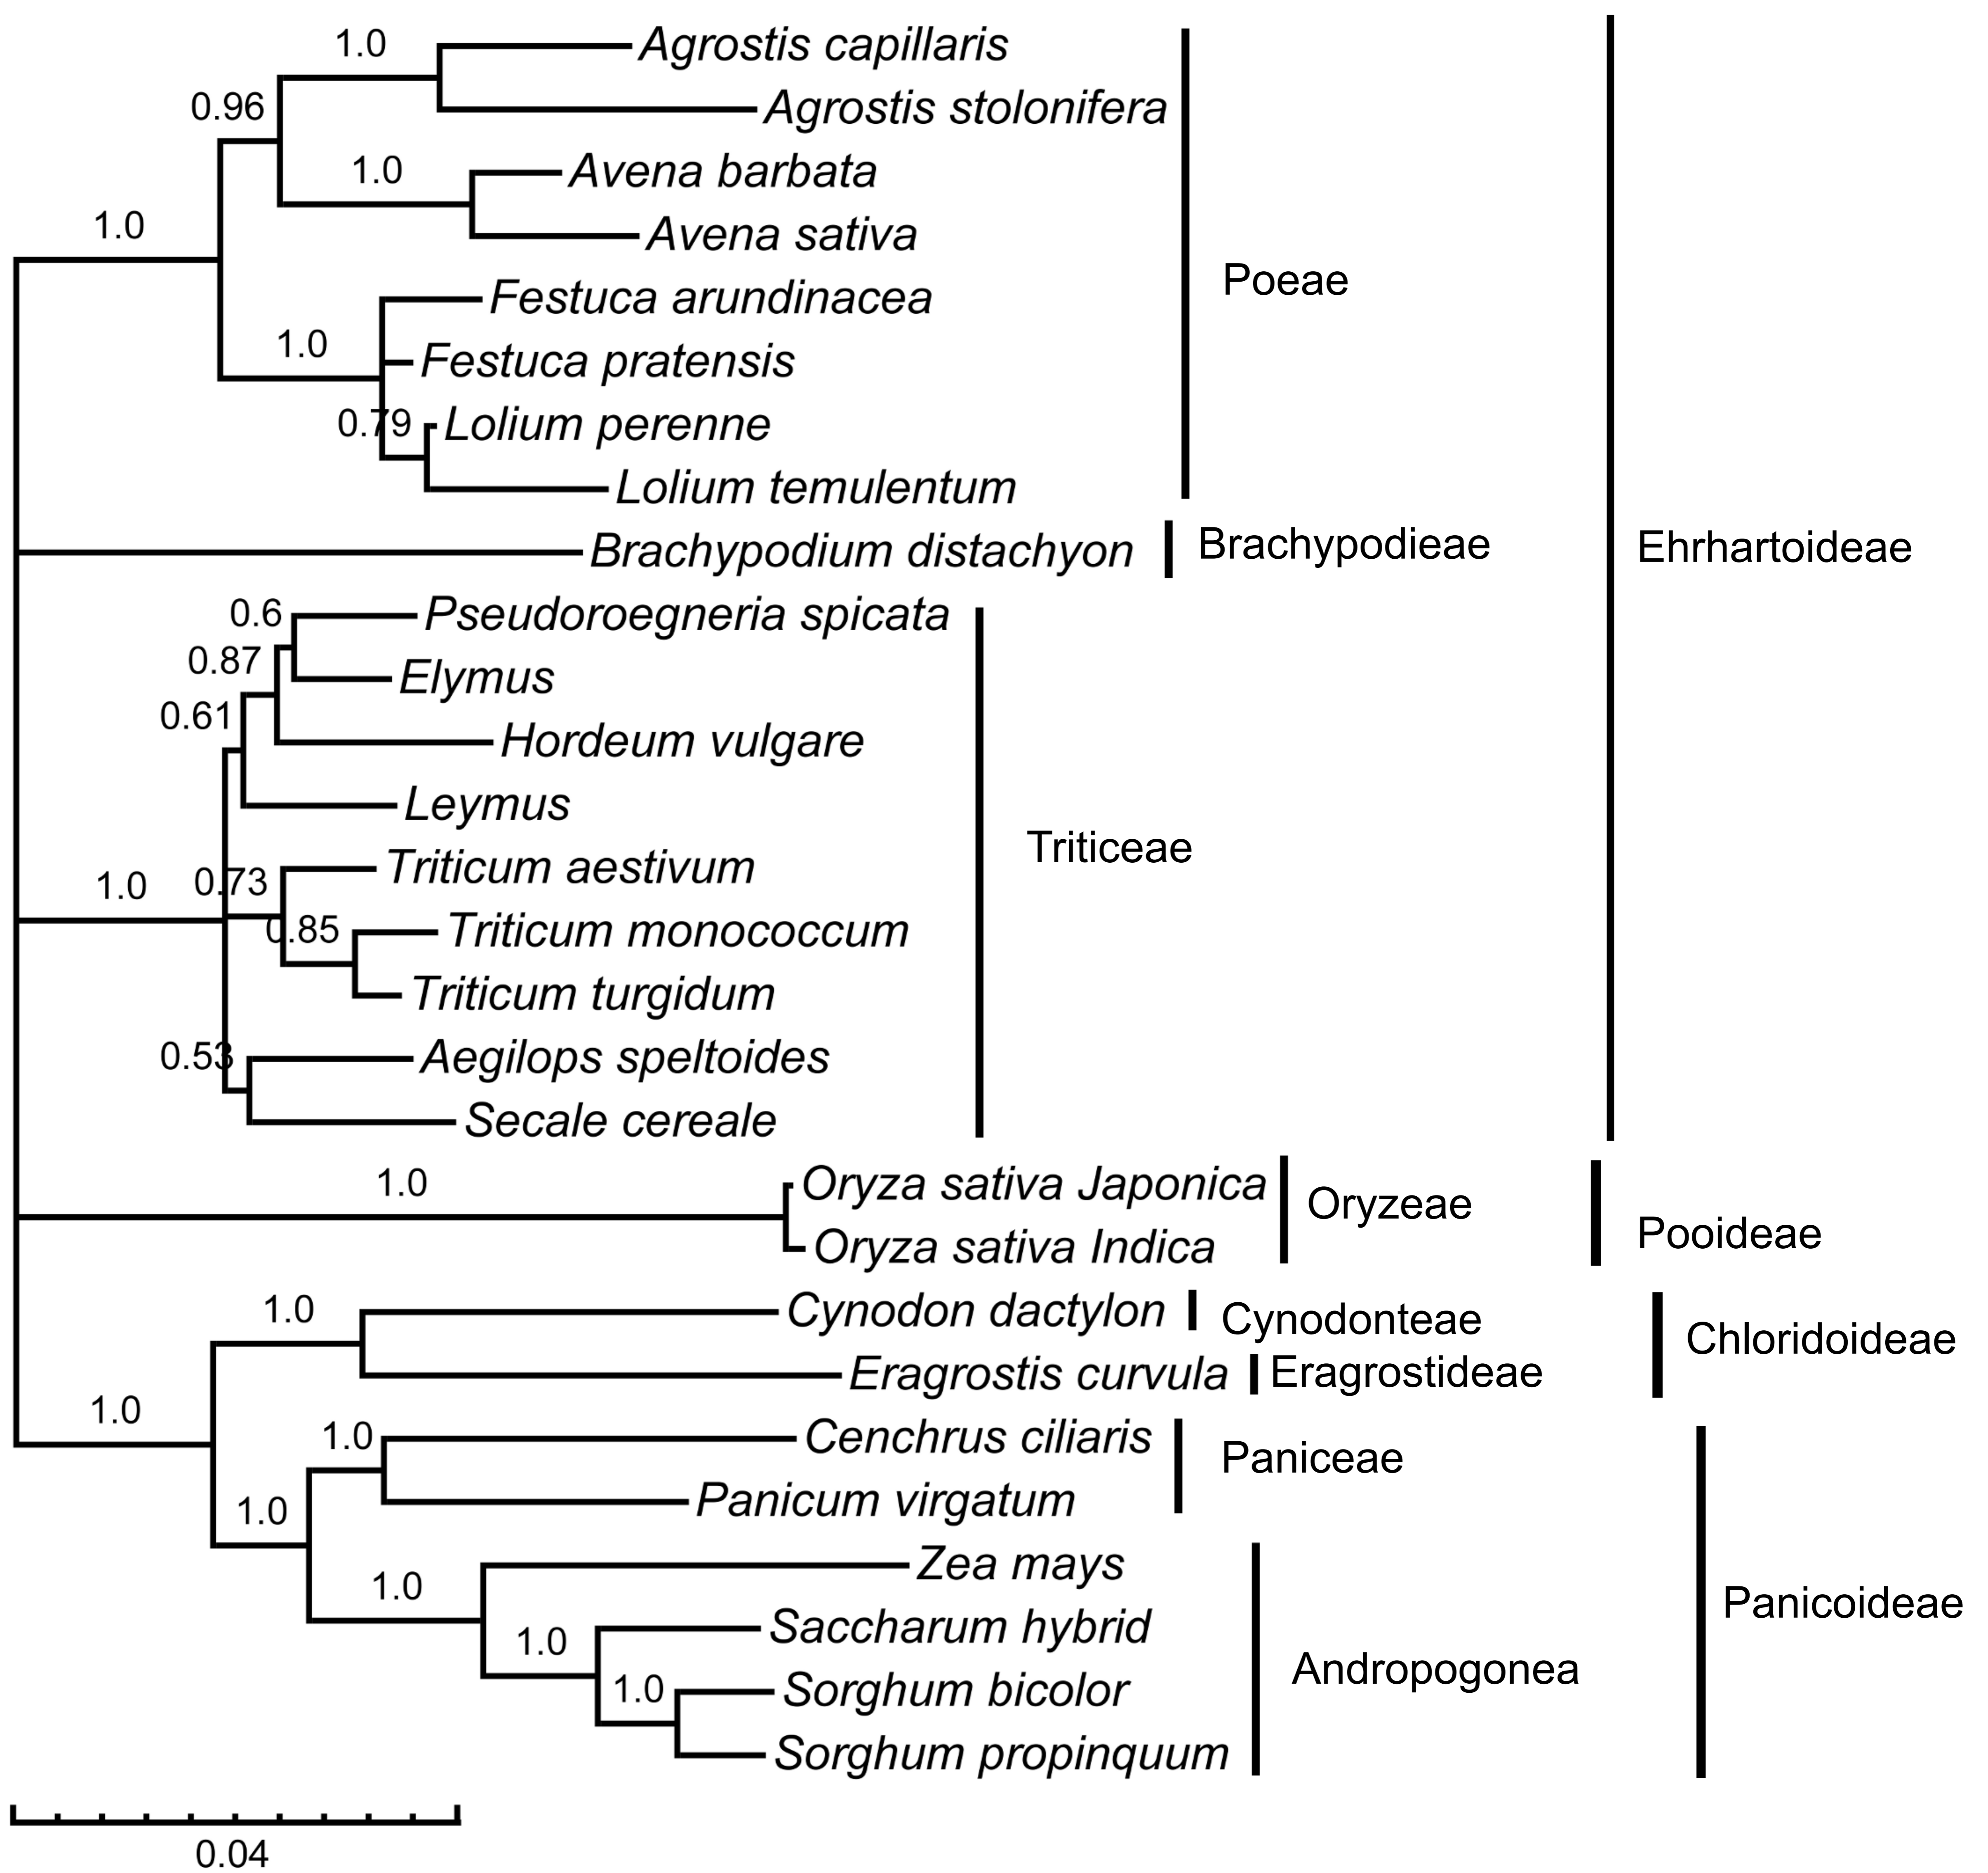

Figure S3. The phylogeny of mainland Poaceae species used for comparisons with island Schiedea
