# Supplementary material for: Molecular Adaptation during a Rapid Adaptive Radiation
Source: PubMed Central journal article supplement — Mol Biol Evol. 2013 Jan 25;30(5):1051–9. doi: 10.1093/molbev/mst013 (PMC3670742; doi:10.1093/molbev/mst013), 2013-01-25
Supplement: supp_mst013_Figures_S4-S8.pdf [file supp_mst013_Figures_S4-S8.pdf]

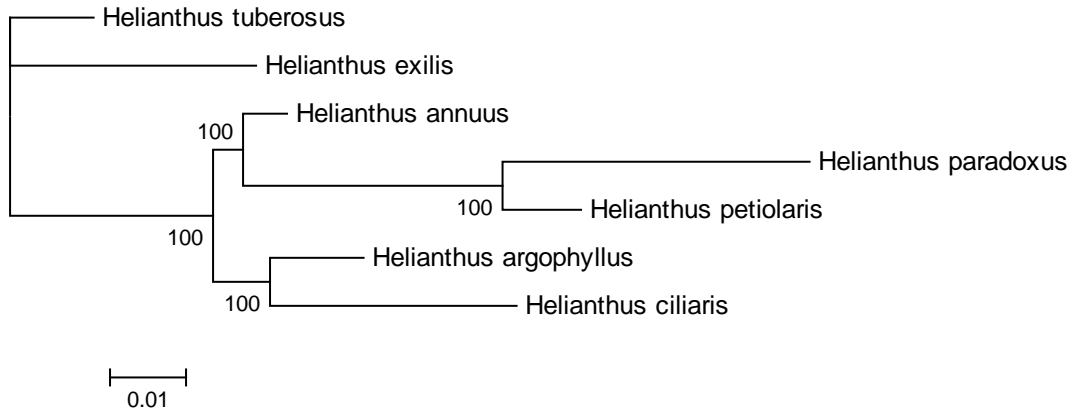

Figure S4. The phylogeny of mainland *Helianthus* species used for comparisons with island *Schiedea*.

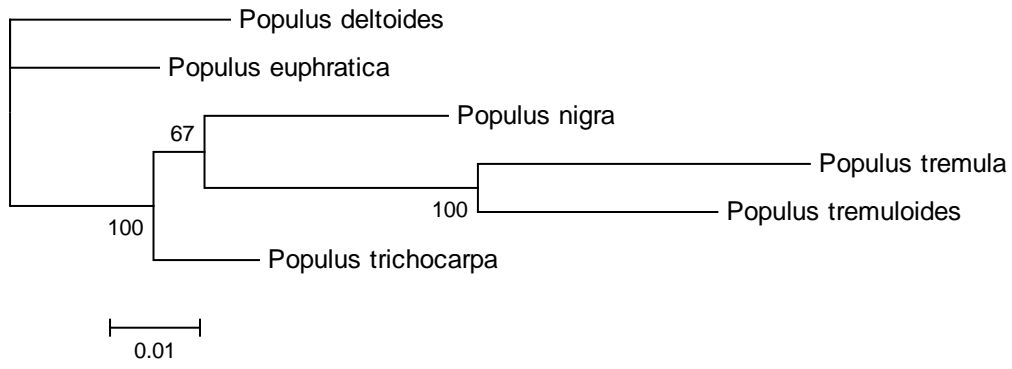

Figure S5. The phylogeny of mainland *Populus* species used for comparisons with island *Schiedea*.

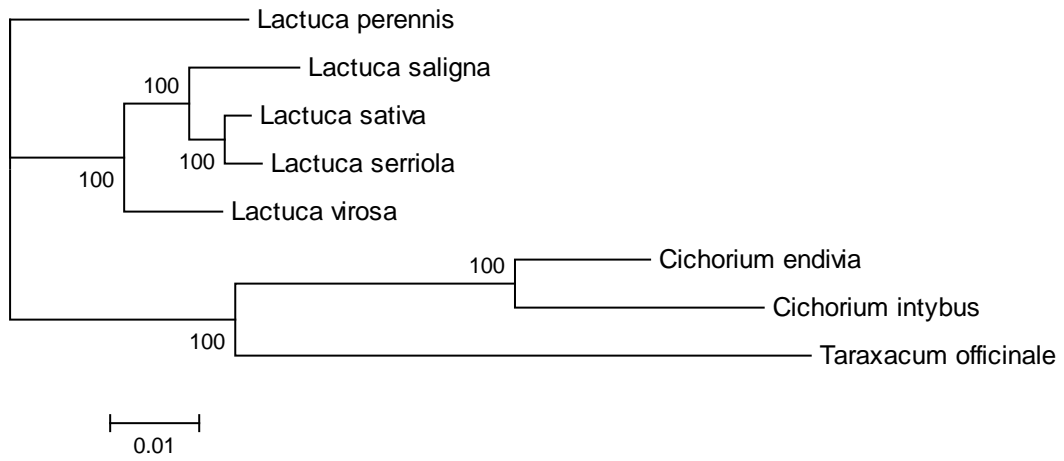

Figure S6. The phylogeny of mainland Cichorieae species used for comparisons with island *Schiedea*.

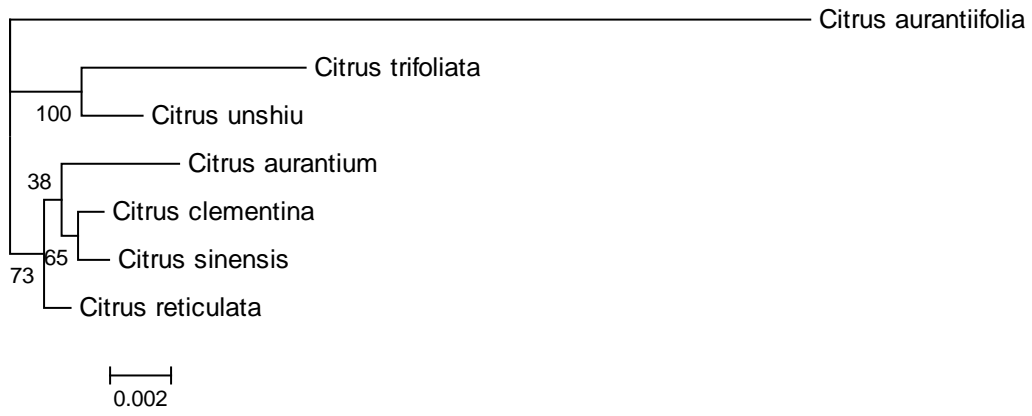

Figure S7. The phylogeny of mainland *Citrus* species used for comparisons with island *Schiedea*.

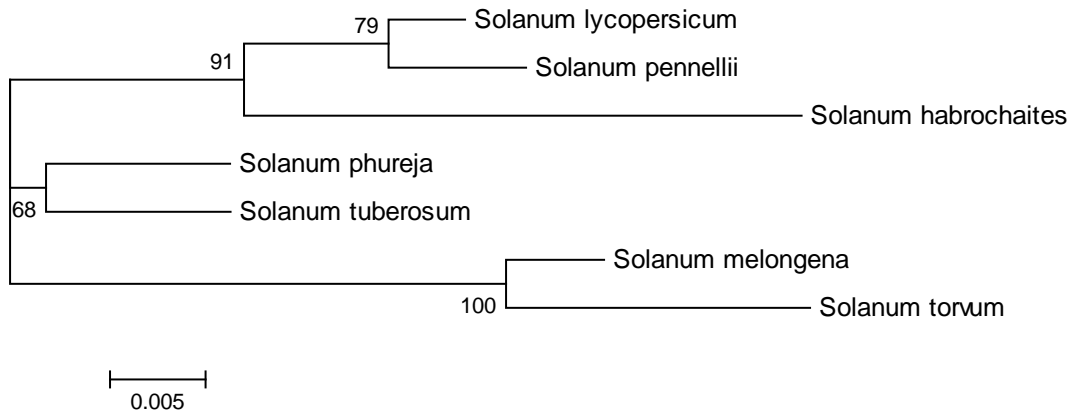

Figure S8. The phylogeny of mainland *Solanum* species used for comparisons with island *Schiedea*.
