# Supplementary material for: Molecular Adaptation during a Rapid Adaptive Radiation
Source: PubMed Central journal article supplement — Mol Biol Evol. 2013 Jan 25;30(5):1051–9. doi: 10.1093/molbev/mst013 (PMC3670742; doi:10.1093/molbev/mst013), 2013-01-25
Supplement: supp_mst013_Tables_S1-S4_and_S6.pdf [file supp_mst013_Tables_S1-S4_and_S6.pdf]

**Table S1. Genes analyzed in *Schiedea* species**

| Gene                             | Proportion of<br>gene length, % | Species<br>analysed | Sequence length |        | Substitutions |    |     | Divergence, % |      |      |
|----------------------------------|---------------------------------|---------------------|-----------------|--------|---------------|----|-----|---------------|------|------|
|                                  |                                 |                     | exon            | intron | N*            | S* | Nc* | N*            | S*   | Nc*  |
| Dymeclin                         | 14                              | 27                  | 285             | 574    | 4             | 1  | 33  | 0.13          | 0.12 | 0.79 |
| DUF1191 superfamily protein      | 30                              | 23                  | 288             | 252    | 5             | 5  | 10  | 0.54          | 1.58 | 0.58 |
| Glyceraldehyde-3-P dehydrogenase | 21                              | 26                  | 219             | 425    | 4             | 9  | 39  | 0.4           | 2.43 | 2.13 |
| 40S ribosomal protein S4         | 51                              | 27                  | 405             | 521    | 3             | 10 | 63  | 0.19          | 3.12 | 2.73 |
| LuxR transcriptional regulator   | 35                              | 27                  | 279             | 486    | 2             | 6  | 58  | 0.07          | 1.79 | 1.8  |
| EXS family protein               | 33                              | 25                  | 399             | 312    | 5             | 7  | 27  | 0.39          | 1.22 | 1.31 |
| Lhcb1                            | 64                              | 27                  | 516             | 45     | 7             | 20 | 8   | 0.29          | 3.45 | 3.13 |
| NAC domain protein               | 28                              | 27                  | 354             | 377    | 20            | 9  | 54  | 1.17          | 3.27 | 2.5  |
| 1-aminocyclopropane oxidase      | 13                              | 22                  | 123             | 92     | 1             | 5  | 18  | 0.09          | 5.56 | 5.04 |
| Tubulin beta                     | 17                              | 27                  | 222             | 81     | 7             | 9  | 9   | 0.46          | 3.23 | 1.74 |
| Fructose-biphosphate aldolase    | 34                              | 27                  | 369             | 0      | 2             | 9  | NA  | 0.05          | 1.45 | NA   |
| NHL repeat-containing protein    | 11                              | 23                  | 249             | 234    | 10            | 7  | 31  | 0.78          | 2.55 | 2.61 |
| Cell division protein            | 10                              | 27                  | 420             | 54     | 43            | 18 | 4   | 1.89          | 2.42 | 1.36 |
| Integral membrane family protein | 48                              | 23                  | 243             | 546    | 6             | 11 | 91  | 0.6           | 3.39 | 3.46 |
| Adenosylmethionine decarboxylase | 23                              | 27                  | 246             | 0      | 3             | 1  | NA  | 0.12          | 0.13 | NA   |
| Enolase                          | 25                              | 20                  | 327             | 541    | 1             | 9  | 53  | 0.08          | 2.08 | 1.88 |
| Metallothionein                  | 68                              | 27                  | 162             | 110    | 2             | 7  | 21  | 0.4           | 1.61 | 2.85 |
| Proteophosphoglycan              | 32                              | 22                  | 570             | 593    | 4             | 14 | 33  | 0.22          | 2.68 | 1.05 |
| Sucrose synthase                 | 15                              | 20                  | 354             | 613    | 3             | 8  | 42  | 0.28          | 1.53 | 1.02 |
| Malate dehydrogenase             | 34                              | 27                  | 339             | 431    | 6             | 9  | 51  | 0.26          | 2.06 | 1.83 |
| CBP5                             | 44                              | 27                  | 348             | 0      | 5             | 14 | NA  | 0.49          | 2.48 | NA   |

**Table S1 (continued). Genes analyzed in *Schiedea* species**

| Gene                             | Proportion of<br>gene length, % | Species<br>analysed | Sequence length |        | Substitutions |    |     | Divergence, % |      |      |
|----------------------------------|---------------------------------|---------------------|-----------------|--------|---------------|----|-----|---------------|------|------|
|                                  |                                 |                     | exon            | intron | N*            | S* | Nc* | N*            | S*   | Nc*  |
| Ornithine carbamoyltransferase   | 35                              | 27                  | 393             | 436    | 10            | 12 | 47  | 0.48          | 2.14 | 1.76 |
| Glycosyl hydrolase               | 11                              | 20                  | 246             | 587    | 9             | 8  | 41  | 0.85          | 1.81 | 1.97 |
| Monodehydroascorbate reductase   | 17                              | 22                  | 249             | 333    | 5             | 1  | 33  | 0.72          | 0.46 | 2.14 |
| Thioredoxin H-type               | 95                              | 24                  | 450             | 1061   | 22            | 18 | 100 | 1.5           | 6.39 | 2.11 |
| Ran-binding protein              | 9                               | 27                  | 285             | 484    | 10            | 6  | 59  | 0.58          | 1.26 | 1.88 |
| Adenosyl-homocysteine hydrolase  | 10                              | 27                  | 150             | 252    | 1             | 5  | 29  | 0.07          | 1.82 | 1.88 |
| Auxin-responsive protein IAA1    | 47                              | 20                  | 282             | 170    | 12            | 7  | 24  | 0.95          | 1.56 | 2.57 |
| Mannitol dehydrogenase           | 22                              | 20                  | 234             | 159    | 9             | 5  | 15  | 1.05          | 3.25 | 2.3  |
| Ubiquitin activating enzyme      | 11                              | 27                  | 363             | 0      | 10            | 11 | NA  | 0.62          | 2.53 | NA   |
| G-protein beta (wd40 protein)    | 40                              | 23                  | 429             | 336    | 8             | 7  | 20  | 0.37          | 1.52 | 1.03 |
| Aldehyde dehydrogenase           | 29                              | 20                  | 471             | 695    | 17            | 24 | 66  | 1.4           | 8.71 | 4.02 |
| Endomembrane protein 70          | 21                              | 25                  | 411             | 112    | 3             | 7  | 19  | 0.08          | 1.69 | 2.59 |
| Glycerol 3-phosphate permease    | 12                              | 25                  | 432             | 109    | 11            | 15 | 22  | 0.51          | 2.19 | 4.16 |
| Delta tonoplast integral protein | 47                              | 22                  | 348             | 345    | 4             | 10 | 39  | 0.14          | 1.37 | 2.03 |
| Oxidoreductase                   | 15                              | 20                  | 255             | 0      | 5             | 9  | NA  | 0.39          | 4.22 | NA   |

\* N, S and Nc stand for Nonsynonymous, Synonymous and Non-coding

**Table S2.** Taxonomy, distribution and ecological characteristics of 27 analyzed*Schiedea* species [after Wagner et al. 2005]

| Section                           | Island <sup>1</sup> | Species                              | Ecotype <sup>2</sup>                         |    |
|-----------------------------------|---------------------|--------------------------------------|----------------------------------------------|----|
| Former genus <i>Schiedea</i> s.s. |                     |                                      |                                              |    |
| <i>Alphaschiedea</i>              | Kaua`i              | <i>helleri</i> Sherff                | HW                                           |    |
|                                   |                     | <i>membranacea</i> H.St.John         | HM                                           |    |
| <i>Anestioschiedea</i>            | Kaua`i              | <i>apokremnos</i> H.St.John          | SD                                           |    |
| <i>Mononeura</i>                  | Kaua`i              | <i>kauaiensis</i> H.St.John          | SM                                           |    |
|                                   |                     | <i>perlmanii</i> W.L.Wagner & Weller | HM                                           |    |
|                                   |                     | <i>stellarioides</i> H.Mann          | SM                                           |    |
|                                   | O`ahu               | <i>kaalae</i> Wawra                  | HM                                           |    |
|                                   |                     | <i>nuttallii</i> Hook.               | SM                                           |    |
|                                   |                     |                                      | <i>pentandra</i> W.L.Wagner & E.M.Harris     | HM |
|                                   | Maui Nui            |                                      | <i>jacobii</i> W.L.Wagner, Weller & Medeiros | HW |
|                                   |                     | <i>loui</i> W.L.Wagner & Weller      | SW                                           |    |
| <i>Schiedea</i>                   | Kaua`i              | <i>spergulina</i> A.Gray             | SD                                           |    |
|                                   | O`ahu               | <i>adamantis</i> H.St.John           | SD                                           |    |
|                                   |                     | <i>globosa</i> H.Mann                | SD                                           |    |
|                                   |                     | <i>hookeri</i> A.Gray                | SM                                           |    |
|                                   |                     | <i>kealiae</i> Caum & Hosaka         | SD                                           |    |
|                                   |                     | <i>ligustrina</i> Cham. & Schltdl.   | SD                                           |    |
|                                   |                     | <i>mannii</i> H.St.John              | SD                                           |    |
|                                   | Maui Nui            | <i>haleakalensis</i> Deg. & Sherff   | SD                                           |    |
|                                   |                     | <i>lydgatei</i> Hillebr.             | SD                                           |    |
|                                   |                     | <i>menziesii</i> Hook.               | SD                                           |    |

|                                   |        |                                             |    |
|-----------------------------------|--------|---------------------------------------------|----|
|                                   |        | <i>Salicaria</i> Hillebr.                   | SD |
|                                   |        | <i>sarmentosa</i> Deg. & Sherff             | SD |
| Former genus <i>Alsinidendron</i> |        |                                             |    |
| <i>Alsinidendron</i>              | O`ahu  | <i>obovata</i> (Sherff) W.L.Wagner & Weller | SM |
|                                   |        | <i>trinervis</i> (H.Mann) Pax & K.Hoffm.    | SW |
| <i>Nothoschiedea</i>              | Kaua`i | <i>viscosa</i> H.Mann                       | HM |
| <i>Polyneura</i>                  | Nihoa  | <i>verticillata</i> F.Brown                 | HD |

---

<sup>1</sup>We consider Moloka`i, Lana`i and Maui as a single island (Maui Nui), because they were interconnected for more than 75% of their existence.

<sup>2</sup>The first letter is for habit (S = shrub or subshrub; H = perennial herb or vine), the second letter is for habitat (W = wet; M = mesic; D = dry).

**Table S3.** Molecular functions of analyzed genes (after <http://www.brenda-enzymes.org/> and <http://www.geneontology.org/> databases)

| Gene                                      | EC number | molecular function                                                                       | biological process                                                                                                           |
|-------------------------------------------|-----------|------------------------------------------------------------------------------------------|------------------------------------------------------------------------------------------------------------------------------|
| 1-aminocyclopropane-1-carboxylate oxidase | 1.14.17.4 | aminocyclopropanecarboxylate oxidase activity                                            | biosynthesis of plant hormones, methionine metabolism                                                                        |
| 40S ribosomal protein S4                  |           | RNA binding                                                                              | translation                                                                                                                  |
| Aldehyde dehydrogenase                    | 1.2.1.3   | benzaldehyde dehydrogenase (NAD <sup>+</sup> ) activity                                  | oxidation reduction<br>developmental responses in plants (cell division, differentiation of embryo responses, body patterns) |
| Auxin-responsive protein IAA1             |           | identical protein binding                                                                | development                                                                                                                  |
| Cell division protein                     |           |                                                                                          | cell division                                                                                                                |
| CBP5                                      |           | chlorophyll binding<br>water channel,<br>methylammonium<br>transmembrane transporter and | photosynthesis                                                                                                               |
| Delta tonoplast integral protein          |           | ammonia transporter activity                                                             | transport                                                                                                                    |
| Dymeclin                                  |           |                                                                                          | regulation of smoothened signaling pathway                                                                                   |

|                                                     |          |                                          |                                                                    |
|-----------------------------------------------------|----------|------------------------------------------|--------------------------------------------------------------------|
| DUF1191 superfamily protein                         |          | unknown function                         |                                                                    |
| Endomembrane protein 70                             |          | transporter activity                     | transport                                                          |
| Enolase (2-phosphoglycerate dehydratase)            | 4.2.1.11 | phosphopyruvate hydratase activity       | glycolysis / gluconeogenesis                                       |
| EXS family protein                                  |          | unknown function                         |                                                                    |
|                                                     |          |                                          | carbon fixation, fructose and mannose metabolism,                  |
|                                                     |          | fructose-biphosphate aldolase            | glycolysis / gluconeogenesis, inositol metabolism, pentose         |
| Fructose-biphosphate aldolase                       | 4.1.2.13 | activity                                 | phosphate pathway                                                  |
| G-protein beta (wd40 protein)                       |          | unknown function                         |                                                                    |
|                                                     |          | glyceraldehyde-3-phosphate               | gluconeogenesis, glycolysis, response to heat, response to         |
| Glyceraldehyde-3-phosphate dehydrogenase, C subunit | 1.2.1.12 | dehydrogenase (phosphorylating) activity | oxidative stress, response to stress, response to sucrose stimulus |
| Glycerol 3-phosphate permease                       | 3.6.3.20 | transporter activity                     | transport                                                          |
| Glycosyl hydrolases family 17 protein               |          | hydrolase activity                       | may be involved in defense of plants against pathogens             |
| Integral membrane family protein                    |          | membrane channel                         | transport                                                          |
| Lhcb1                                               |          | Light harvesting                         | photosynthesis                                                     |

|                                                         |           |                                                                                      |                                                                                                                                                    |
|---------------------------------------------------------|-----------|--------------------------------------------------------------------------------------|----------------------------------------------------------------------------------------------------------------------------------------------------|
| LuxR family transcriptional regulator                   |           | transcription factor activity                                                        | regulation of transcription<br>carbon fixation, citrate cycle (TCA cycle), glyoxylate and dicarboxylate metabolism, pyruvate metabolism, reductive |
| Malate dehydrogenase                                    | 1.1.1.37  | malate dehydrogenase activity                                                        | carboxylate cycle (CO2 fixation), response to cold                                                                                                 |
| Mannitol dehydrogenase (cinnamyl alcohol dehydrogenase) | 1.1.1.195 | aryl-alcohol dehydrogenase and oxidoreductase activity, protein and zinc ion binding | phenylpropanoid biosynthesis                                                                                                                       |
| Metallothionein                                         |           | metal ion binding                                                                    | cellular copper ion homeostasis                                                                                                                    |
| Monodehydroascorbate reductase                          | 1.6.5.4   | monodehydroascorbate reductase (NADH) activity                                       | ascorbate and aldarate metabolism                                                                                                                  |
| NAC domain protein                                      |           | unknown function                                                                     |                                                                                                                                                    |
| NHL repeat-containing protein                           |           | unknown function                                                                     |                                                                                                                                                    |
| Ornithine carbamoyltransferase                          | 2.1.3.3   | amino acid binding / carboxyl- and carbamoyltransferase                              | arginine and proline metabolism                                                                                                                    |
| Oxidoreductase                                          | 1.8.1.8   | protein-disulfide reductase activity                                                 | oxidative stress                                                                                                                                   |

|                                    |          |                                 |                                                            |
|------------------------------------|----------|---------------------------------|------------------------------------------------------------|
| Proteophosphoglycan                |          | DNA binding                     | regulation of transcription, DNA-dependent                 |
| Ran-binding protein                |          | unknown function                |                                                            |
| S-Adenosyl-L-homocysteine          |          |                                 | methionine metabolism, selenoamino acid metabolism,        |
| hydrolase (adenosylhomocysteinase) | 3.3.1.1  | adenosylhomocysteinase activity | one-carbon compound metabolic process                      |
|                                    |          | adenosylmethionine              |                                                            |
| S-Adenosylmethionine               |          | decarboxylase and electron      | methionine metabolism, spermidine biosynthetic process,    |
| decarboxylase 2                    | 4.1.1.50 | carrier activity                | spermine biosynthetic process                              |
|                                    |          |                                 | starch and sucrose metabolism, response to osmotic stress, |
| Sucrose synthase                   | 2.4.1.13 | sucrose synthase activity       | response to flooding, response to cold                     |
|                                    |          |                                 | protection against oxidative stress and carbon/nitrogen    |
| Thioredoxin H-type                 |          |                                 | metabolism regulation                                      |
| Tubulin beta                       |          | structural molecule activity    | constituent parts of eukaryotic cell structures            |
|                                    |          | ubiquitin activating enzyme     | response to other organism, ubiquitin-dependent protein    |
| Ubiquitin activating enzyme        |          | activity                        | catabolic process                                          |

---



**Table S4.** Primers used in the study

| Gene                                      | Forward primer             | Reverse primer            |
|-------------------------------------------|----------------------------|---------------------------|
| 1-aminocyclopropane-1-carboxylate oxidase | CAACTGCTGGACTTGCTCTG       | CAGTGCTTTCCATTGCCTTC      |
| 40S ribosomal protein S4                  | TTTAAGGACTCTATGGTAACCAGAG  | CAAAGGGTAGATTCAGGTTGC     |
| Aldehyde dehydrogenase, mitochondrial     | TGAAAGACGCTCAGTCGGAG       | AATCACGCCACATAATCGTC      |
| Auxin-responsive protein IAA1             | ATGGCCACCAATAAGATCAT       | TTCACGTTTATTAATCTGCC      |
| Cell division protein                     | GACATCATAACAGAGACGCTCC     | CCCAGAGACCCTGATTCTCTG     |
| CBP5                                      | AATCGAATTCAACATCAAAGGC     | TTTGCCAAGAACCGTGAACT      |
| Delta tonoplast integral protein          | CAAATAAGGCAGAAACAACATCTT   | CGGTTCTTTCCTTCTTAAGGCT    |
| Dymeclin                                  | TTTTCATTTCTGCATTGGGTC      | GCATCCATACGACTATTGAAGAA   |
| DUF1191 superfamily protein               | TATCAGTCAACCATCGACAGTGG    | ATTGCTCCTTCTCCATCCCC      |
| Endomembrane protein 70                   | AATAAAATACCTAGGCAAATCCCG   | GCTGAACAAGCATCCTAAGGAT    |
| Enolase                                   | AAGAAAAAGGTCACCACACATCT    | TGTTGGTGATGACCTCTTGGT     |
| EXS family protein                        | AAACTACAAAATGGTTGTTTCAGTCG | CACTCAAATATCACGTGTTCCCT   |
| Fructose-biphosphate aldolase             | TGCTGAGGTTTCCGAGCGAG       | TGTACTTTCCGAGGGTTGCC      |
| G-protein beta (wd40 protein)             | GTGCCTTGCTGTGGACTTTG       | AATTGGCAGGAGTGGTGCAG      |
| Glyceraldehyde-3P dehydrogenase           | ACTCCTTTACAGACTGCAAACCTCAG | TTTCGGTTGTTGATCTTACTGTCAG |

|                                       |                           |                           |
|---------------------------------------|---------------------------|---------------------------|
| Glycerol 3-phosphate permease         | CCGTTGCTACTTTTACAATATCAA  | TTCGGATAAACTAGATGCCAGA    |
| Glycosyl hydrolase                    | TTACTCAATTACTACTTGGACGAGG | GCTAGTTGTTCTTGGTGGAAAGTTA |
| Integral membrane family protein      | CCATTACTTTCTTTTCCTCCATG   | GTCCCTTTTTTTCACATTTAGAAT  |
| Lhcb1                                 | CATTCGCCAAGAACCGTGAG      | GCATTGTTAGCCACTGGGTCTG    |
| LuxR family transcriptional regulator | GAGGGCAATTTCAAAGGCTC      | GAAGAACGTGGCTTAGAAAGGT    |
| Malate dehydrogenase                  | AACCAGCTCAAATAGTCTCGTCA   | TCAACCATGCAACCGTATGC      |
| Mannitol dehydrogenase                | TTTTCAGTGAAAAGCATCTC      | CGTTGCTGTCAAGTTTGCTA      |
| Metallothionein                       | CGGAGGGTGCAAGATGTTTG      | CAAACCCTAACAAAGACGAGTCAC  |
| Monodehydroascorbate reductase        | TTTTTGCTATTGGAGATGTTGC    | AATGCTTTGTGGACAATTTCC     |
| NAC domain protein                    | GCCGATTCTAGAATTTAGATGACG  | AGCAAGCGATGAAGATGACA      |
| NHL repeat-containing protein         | TCACGCTAATTGCTAACTTAACTC  | CACCATCATAGGAAGTCAAAGTCT  |
| Ornithine carbamoyltransferase        | CTGCCTAAAACATCAAACACAC    | GAGATGGAAACAATATCGTGCA    |
| Oxidoreductase                        | TGACATTCTCGAAAAGAAGAGCTGG | AGGTGCAATAAGCTGTCTTTTCG   |
| Proteophosphoglycan                   | GGTTTCTCTATGGACGCTCC      | CGTTCCGATCACTGGTAATG      |
| Ran-binding protein                   | TTGCAAAAACCTTTCCCTGTTC    | CAATTGATCACCTGGCAACTT     |
| S-Adenosyl-L-homocysteine hydrolase   | TGCTCTTGCCTTAAAGGCTG      | TTGGGCAATAACTTGGTTGG      |
| S-Adenosylmethionine decarboxylase    | GCTCTCTGATGAACGCCATT      | CATGGGAGGGCTAACAGTACTAG   |

|                             |                           |                           |
|-----------------------------|---------------------------|---------------------------|
| Sucrose synthase            | AAACGCTGCTCATCTTATTTCA    | TGTGGTTGAAGCTATGACTTGTG   |
| Thioredoxin H-type          | TTGAGGGTTCTCATATTTTC      | CCACATCATAACATACACAA      |
| Tubulin beta                | GTTGAGTGGATCCCGAACAA      | CAAACCAGTATGACTAACATGTCCT |
| Ubiquitin activating enzyme | TTTACTGTATTTTATATCCGCAGCG | ATACGTTTGCGAATCTGGCA      |

---

**Table S6. PAML results for *Schiedea* and mainland groups**

***Schiedea***

| Gene                             | N species | M0          |       | M8/M8a LRT |       |
|----------------------------------|-----------|-------------|-------|------------|-------|
|                                  |           | tree length | dN/dS | p-value    | FDR   |
| Dymeclin                         | 27        | 0.05        | 1.12  | 0.500      | 1.000 |
| DUF1191 superfamily protein      | 23        | 0.11        | 0.43  | 0.171      | 1.000 |
| Glyceraldehyde-3-P dehydrogenase | 26        | 0.21        | 0.23  | 0.042      | 1.000 |
| 40S ribosomal protein S4         | 27        | 0.13        | 0.04  | 0.500      | 1.000 |
| LuxR transcriptional regulator   | 27        | 0.14        | 0.05  | 0.103      | 1.000 |
| EXS family protein               | 25        | 0.11        | 0.25  | 0.137      | 1.000 |
| Lhcb1                            | 27        | 0.24        | 0.11  | 0.500      | 1.000 |
| NAC domain protein               | 27        | 0.37        | 0.71  | 0.003      | 0.096 |
| 1-aminocyclopropane oxidase      | 22        | 0.29        | 0.03  | 0.500      | 1.000 |
| Tubulin beta                     | 27        | 0.27        | 0.26  | 0.219      | 1.000 |
| Fructose-biphosphate aldolase    | 27        | 0.09        | 0.07  | 0.500      | 1.000 |
| NHL repeat-containing protein    | 23        | 0.35        | 0.55  | 0.000      | 0.000 |
| Cell division protein            | 27        | 0.57        | 1.44  | 0.000      | 0.000 |
| Integral membrane family protein | 23        | 0.25        | 0.18  | 0.500      | 1.000 |
| Adenosylmethionine decarboxylase | 27        | 0.05        | 1.00  | 0.500      | 1.000 |
| Enolase                          | 20        | 0.14        | 0.03  | 0.500      | 1.000 |
| Metallothionein                  | 27        | 0.22        | 0.09  | 0.065      | 1.000 |
| Proteophosphoglycan              | 22        | 0.12        | 0.07  | 0.500      | 1.000 |
| Sucrose synthase                 | 20        | 0.10        | 0.13  | 0.500      | 1.000 |
| Malate dehydrogenase             | 27        | 0.17        | 0.21  | 0.376      | 1.000 |
| CBP5                             | 27        | 0.28        | 0.50  | 0.000      | 0.000 |
| Ornithine carbamoyltransferase   | 27        | 0.22        | 0.32  | 0.021      | 0.609 |
| Glycosyl hydrolase               | 20        | 0.14        | 0.96  | 0.001      | 0.034 |
| Monodehydroascorbate reductase   | 22        | 0.12        | 1.18  | 0.006      | 0.186 |
| Thioredoxin H-type               | 24        | 0.42        | 0.82  | 0.007      | 0.210 |
| Ran-binding protein              | 27        | 0.23        | 0.52  | 0.219      | 1.000 |
| Adenosyl-homocysteine hydrolase  | 27        | 0.17        | 0.05  | 0.500      | 1.000 |
| Auxin-responsive protein IAA1    | 20        | 0.25        | 0.58  | 0.090      | 1.000 |
| Mannitol dehydrogenase           | 20        | 0.29        | 0.36  | 0.147      | 1.000 |
| Ubiquitin activating enzyme      | 27        | 0.31        | 0.26  | 0.001      | 0.034 |
| G-protein beta (wd40 protein)    | 23        | 0.14        | 0.21  | 0.500      | 1.000 |
| Aldehyde dehydrogenase           | 20        | 0.23        | 0.18  | 0.500      | 1.000 |
| Endomembrane protein 70          | 25        | 0.08        | 0.08  | 0.500      | 1.000 |
| Glycerol 3-phosphate permease    | 25        | 0.24        | 0.31  | 0.103      | 1.000 |
| Delta tonoplast integral protein | 22        | 0.14        | 0.16  | 0.500      | 1.000 |
| Oxidoreductase                   | 20        | 0.28        | 0.14  | 0.500      | 1.000 |
| Average                          |           | 0.21        | 0.38  |            |       |

**Table S6. PAML results for *Schiedea* and mainland groups (continued)**

| <b>Poaceae</b>                   |                  |                    |              |                   |            |
|----------------------------------|------------------|--------------------|--------------|-------------------|------------|
| <b>Gene</b>                      | <b>N species</b> | <b>M0</b>          |              | <b>M8/M8a LRT</b> |            |
|                                  |                  | <b>tree length</b> | <b>dN/dS</b> | <b>p-value</b>    | <b>FDR</b> |
| Glyceraldehyde-3-P dehydrogenase | 26               | 3.46               | 0.06         | 0.810             | 1.000      |
| 40S ribosomal protein S4         | 20               | 2.08               | 0.02         | 0.889             | 1.000      |
| Lhcb1                            | 19               | 2.96               | 0.00         | 0.949             | 1.000      |
| 1-aminocyclopropane oxidase      | 15               | 1.42               | 0.01         | 0.909             | 1.000      |
| Tubulin beta                     | 21               | 3.34               | 0.02         | 0.877             | 1.000      |
| Fructose-biphosphate aldolase    | 24               | 2.98               | 0.07         | 0.793             | 0.903      |
| Enolase                          | 24               | 3.38               | 0.03         | 0.858             | 1.000      |
| Sucrose synthase                 | 15               | 2.78               | 0.05         | 0.824             | 1.000      |
| Malate dehydrogenase             | 24               | 2.70               | 0.07         | 0.784             | 1.000      |
| CBP5                             | 20               | 3.17               | 0.01         | 0.903             | 1.000      |
| Ornithine carbamoyltransferase   | 15               | 1.68               | 0.09         | 0.766             | 1.000      |
| Glycosyl hydrolase               | 14               | 1.50               | 0.02         | 0.887             | 1.000      |
| Monodehydroascorbate reductase   | 14               | 1.88               | 0.08         | 0.774             | 1.000      |
| Adenosyl-homocysteine hydrolase  | 24               | 3.38               | 0.06         | 0.808             | 1.000      |
| Auxin-responsive protein IAA1    | 17               | 2.43               | 0.08         | 0.778             | 1.000      |
| Mannitol dehydrogenase           | 14               | 2.54               | 0.06         | 0.810             | 1.000      |
| Aldehyde dehydrogenase           | 21               | 3.33               | 0.02         | 0.890             | 1.000      |
| Endomembrane protein 70          | 16               | 1.15               | 0.01         | 0.924             | 1.000      |
| Glycerol 3-phosphate permease    | 12               | 2.23               | 0.06         | 0.807             | 1.000      |
| Delta tonoplast integral protein | 12               | 1.76               | 0.02         | 0.889             | 1.000      |
| Average                          |                  | 2.51               | 0.04         |                   |            |

Table S6. PAML results for *Schiedea* and mainland groups (continued)

Asteraceae

| Gene                             | N species | M0          |       | M8/M8a LRT |       |
|----------------------------------|-----------|-------------|-------|------------|-------|
|                                  |           | tree length | dN/dS | p-value    | FDR   |
| Glyceraldehyde-3-P dehydrogenase | 17        | 2.38        | 0.05  | 0.947      | 1.000 |
| 40S ribosomal protein S4         | 19        | 4.47        | 0.02  | 1.000      | 1.000 |
| Lhcb1                            | 14        | 1.90        | 0.01  | 1.000      | 1.000 |
| 1-aminocyclopropane oxidase      | 20        | 2.27        | 0.03  | 0.750      | 1.000 |
| Tubulin beta                     | 14        | 3.53        | 0.01  | 0.779      | 1.000 |
| Fructose-biphosphate aldolase    | 13        | 3.59        | 0.04  | 1.000      | 1.000 |
| NHL repeat-containing protein    | 18        | 1.80        | 0.06  | 0.305      | 0.996 |
| Cell division protein            | 16        | 3.16        | 0.05  | 1.000      | 1.000 |
| Integral membrane family protein | 16        | 1.18        | 0.03  | 0.996      | 1.000 |
| Adenosylmethionine decarboxylase | 17        | 3.28        | 0.06  | 1.000      | 1.000 |
| Enolase                          | 18        | 1.80        | 0.06  | 0.305      | 0.996 |
| Sucrose synthase                 | 16        | 3.16        | 0.05  | 1.000      | 1.000 |
| Malate dehydrogenase             | 16        | 1.18        | 0.03  | 0.996      | 1.000 |
| CBP5                             | 17        | 3.28        | 0.06  | 1.000      | 1.000 |
| Glycosyl hydrolase               | 19        | 2.42        | 0.05  | 1.000      | 1.000 |
| Adenosyl-homocysteine hydrolase  | 19        | 3.32        | 0.06  | 1.000      | 1.000 |
| Auxin-responsive protein IAA1    | 15        | 1.75        | 0.18  | 1.000      | 1.000 |
| Delta tonoplast integral protein | 19        | 2.85        | 0.07  | 1.000      | 1.000 |
| Average                          |           | 2.63        | 0.05  |            |       |

Table S6. PAML results for *Schiedea* and mainland groups (continued)

Fabaceae

| Gene                             | N species | M0          |       | M8/M8a LRT |       |
|----------------------------------|-----------|-------------|-------|------------|-------|
|                                  |           | tree length | dN/dS | p-value    | FDR   |
| Glyceraldehyde-3-P dehydrogenase | 18        | 4.20        | 0.07  | 0.049      | 0.508 |
| 40S ribosomal protein S4         | 15        | 3.38        | 0.05  | 0.658      | 1.000 |
| Lhcb1                            | 16        | 3.58        | 0.02  | 0.310      | 0.995 |
| Enolase                          | 19        | 1.92        | 0.08  | 1.000      | 1.000 |
| Metallothionein                  | 19        | 4.70        | 0.32  | 0.414      | 1.000 |
| Sucrose synthase                 | 16        | 2.63        | 0.07  | 0.167      | 0.922 |
| Malate dehydrogenase             | 15        | 1.82        | 0.09  | 0.059      | 0.573 |
| CBP5                             | 13        | 1.65        | 0.05  | 1.000      | 1.000 |
| Ornithine carbamoyltransferase   | 11        | 1.38        | 0.20  | 0.205      | 0.960 |
| Glycosyl hydrolase               | 11        | 1.31        | 0.04  | 1.000      | 1.000 |
| Adenosyl-homocysteine hydrolase  | 16        | 2.50        | 0.08  | 0.690      | 1.000 |
| Auxin-responsive protein IAA1    | 12        | 3.40        | 0.11  | 1.000      | 1.000 |
| Ubiquitin activating enzyme      | 11        | 2.27        | 0.10  | 1.000      | 1.000 |
| Average                          |           | 2.67        | 0.10  |            |       |

Table S6. PAML results for *Schiedea* and mainland groups (continued)

*Helianthus*

| Gene                             | M0        |             |       | M8/M8a LRT |       |
|----------------------------------|-----------|-------------|-------|------------|-------|
|                                  | N species | tree length | dN/dS | p-value    | FDR   |
| Glyceraldehyde-3-P dehydrogenase | 6         | 0.83        | 0.07  | 0.500      | 1.000 |
| 40S ribosomal protein S4         | 7         | 0.33        | 0.03  | 0.500      | 1.000 |
| Lhcb1                            | 7         | 1.49        | 0.01  | 0.500      | 1.000 |
| 1-aminocyclopropane oxidase      | 7         | 0.15        | 0.61  | 0.001      | 0.019 |
| Tubulin beta                     | 7         | 3.73        | 0.00  | 0.500      | 1.000 |
| Fructose-biphosphate aldolase    | 7         | 1.79        | 0.05  | 0.142      | 1.000 |
| Enolase                          | 6         | 0.13        | 0.12  | 0.500      | 1.000 |
| Sucrose synthase                 | 5         | 0.50        | 0.03  | 0.500      | 1.000 |
| CBP5                             | 6         | 3.72        | 0.05  | 0.120      | 1.000 |
| Ornithine carbamoyltransferase   | 4         | 0.23        | 0.20  | 0.034      | 0.578 |
| Glycosyl hydrolase               | 7         | 0.20        | 0.23  | 0.216      | 1.000 |
| Monodehydroascorbate reductase   | 5         | 0.10        | 0.14  | 0.500      | 1.000 |
| Adenosyl-homocysteine hydrolase  | 7         | 1.30        | 0.04  | 0.500      | 1.000 |
| Auxin-responsive protein IAA1    | 7         | 3.38        | 0.06  | 0.500      | 1.000 |
| Mannitol dehydrogenase           | 6         | 4.02        | 0.25  | 0.500      | 1.000 |
| Ubiquitin activating enzyme      | 4         | 8.29        | 0.01  | 0.500      | 1.000 |
| Endomembrane protein 70          | 6         | 1.36        | 0.03  | 0.500      | 1.000 |
| Delta tonoplast integral protein | 7         | 0.30        | 0.30  | 0.005      | 0.090 |
| Average                          |           | 1.77        | 0.12  |            |       |



Table S6. PAML results for *Schiedea* and mainland groups (continued)

*Populus*

| Gene                             | N species | M0          |        | M8/M8a LRT |       |
|----------------------------------|-----------|-------------|--------|------------|-------|
|                                  |           | tree length | dN/dS  | p-value    | FDR   |
| Glyceraldehyde-3-P dehydrogenase | 6         | 2.86        | 0.06   | 0.084      | 1.000 |
| 40S ribosomal protein S4         | 6         | 0.75        | 0.07   | 0.485      | 1.000 |
| Lhcb1                            | 6         | 0.25        | 0.02   | 0.500      | 1.000 |
| Tubulin beta                     | 6         | 4.33514     | 0.0182 | 0.500      | 1.000 |
| Fructose-biphosphate aldolase    | 6         | 0.85986     | 0.1605 | 0.500      | 1.000 |
| Enolase                          | 4         | 5.37        | 0.01   | 0.303      | 1.000 |
| Sucrose synthase                 | 6         | 0.86        | 0.14   | 0.500      | 1.000 |
| CBP5                             | 6         | 0.15        | 0.37   | 0.500      | 1.000 |
| Adenosyl-homocysteine hydrolase  | 6         | 0.08        | 1.52   | 0.018      | 0.252 |
| Auxin-responsive protein IAA1    | 4         | 0.69        | 0.11   | 0.500      | 1.000 |
| Mannitol dehydrogenase           | 5         | 0.29        | 0.23   | 0.261      | 1.000 |
| Ubiquitin activating enzyme      | 4         | 0.57        | 0.12   | 0.500      | 1.000 |
| Aldehyde dehydrogenase           | 5         | 2.80        | 0.05   | 0.500      | 1.000 |
| Delta tonoplast integral protein | 6         | 0.24        | 0.28   | 0.135      | 1.000 |
| Average                          |           | 1.44        | 0.23   |            |       |

Table S6. PAML results for *Schiedea* and mainland groups (continued)

Cichorieae

| Gene                             | N species | M0          |       | M8/M8a LRT |       |
|----------------------------------|-----------|-------------|-------|------------|-------|
|                                  |           | tree length | dN/dS | p-value    | FDR   |
| Glyceraldehyde-3-P dehydrogenase | 7         | 0.49        | 0.02  | 0.500      | 1.000 |
| 40S ribosomal protein S4         | 7         | 1.37        | 0.02  | 0.485      | 1.000 |
| Lhcb1                            | 6         | 0.48        | 0.01  | 0.500      | 1.000 |
| Tubulin beta                     | 5         | 0.27        | 0.04  | 0.500      | 1.000 |
| Fructose-biphosphate aldolase    | 6         | 0.61        | 0.04  | 0.087      | 1.000 |
| Enolase                          | 6         | 0.63        | 0.05  | 0.394      | 1.000 |
| Sucrose synthase                 | 6         | 0.85        | 0.05  | 0.477      | 1.000 |
| CBP5                             | 7         | 0.75        | 0.03  | 0.500      | 1.000 |
| Glycosyl hydrolase               | 8         | 1.26        | 0.09  | 0.123      | 1.000 |
| Adenosyl-homocysteine hydrolase  | 7         | 0.90        | 0.08  | 0.500      | 1.000 |
| Auxin-responsive protein IAA1    | 7         | 0.56        | 0.15  | 0.350      | 1.000 |
| Ubiquitin activating enzyme      | 4         | 0.83        | 0.01  | 0.500      | 1.000 |
| Delta tonoplast integral protein | 7         | 0.77        | 0.07  | 0.500      | 1.000 |
| Average                          |           | 0.75        | 0.05  |            |       |

Table S6. PAML results for *Schiedea* and mainland groups (continued)

*Citrus*

| Gene                             | N species | M0          |       | M8/M8a LRT |       |
|----------------------------------|-----------|-------------|-------|------------|-------|
|                                  |           | tree length | dN/dS | p-value    | FDR   |
| Glyceraldehyde-3-P dehydrogenase | 7         | 1.48        | 0.03  | 0.014      | 0.154 |
| 40S ribosomal protein S4         | 6         | 0.03        | 0.00  | 0.500      | 1.000 |
| Lhcb1                            | 7         | 0.10        | 0.03  | 0.009      | 0.108 |
| Tubulin beta                     | 5         | 0.06        | 0.41  | 0.500      | 1.000 |
| Fructose-biphosphate aldolase    | 7         | 0.10        | 0.14  | 0.500      | 1.000 |
| Sucrose synthase                 | 7         | 0.08        | 0.04  | 0.500      | 1.000 |
| CBP5                             | 7         | 0.04        | 0.00  | 0.499      | 1.000 |
| Adenosyl-homocysteine hydrolase  | 7         | 0.13        | 0.00  | 0.499      | 1.000 |
| Auxin-responsive protein IAA1    | 4         | 0.02        | 0.24  | 0.500      | 1.000 |
| Mannitol dehydrogenase           | 7         | 0.11        | 0.29  | 0.064      | 0.640 |
| Delta tonoplast integral protein | 5         | 0.09        | 0.04  | 0.500      | 1.000 |
| Average                          |           | 0.20        | 0.11  |            |       |

Table S6. PAML results for *Schiedea* and mainland groups (continued)

*Solanum*

| Gene                             | N species | M0          |       | M8/M8a LRT |       |
|----------------------------------|-----------|-------------|-------|------------|-------|
|                                  |           | tree length | dN/dS | p-value    | FDR   |
| Glyceraldehyde-3-P dehydrogenase | 5         | 0.28        | 0.17  | 1.000      | 1.000 |
| 40S ribosomal protein S4         | 7         | 0.53        | 0.12  | 1.000      | 1.000 |
| Lhcb1                            | 5         | 0.80        | 0.01  | 1.000      | 1.000 |
| Fructose-biphosphate aldolase    | 5         | 0.76        | 0.07  | 1.000      | 1.000 |
| Enolase                          | 7         | 0.21        | 0.00  | 1.000      | 1.000 |
| Malate dehydrogenase             | 6         | 0.24        | 0.09  | 1.000      | 1.000 |
| Adenosyl-homocysteine hydrolase  | 6         | 0.43        | 0.02  | 1.000      | 1.000 |
| Mannitol dehydrogenase           | 5         | 1.70        | 0.08  | 1.000      | 1.000 |
| Ubiquitin activating enzyme      | 5         | 0.30        | 0.12  | 1.000      | 1.000 |
| Delta tonoplast integral protein | 5         | 0.47        | 0.06  | 1.000      | 1.000 |
| Average                          |           | 0.57        | 0.07  |            |       |
